# Supplementary material for: Polyoxotungstates incorporated organophosphonate and nickel: synthesis, characterization and efficient catalysis for epoxidation of allylic alcohols
Source: Royal Society of Chemistry journal article supplement (doi:10.1039/c8dt02590h), 2018-01-01
Supplement: c8dt02590h1.pdf [file c8dt02590h1.pdf]

*Supporting information*

**Polyoxotungstates incorporated organophosphonate and nickel:  
synthesis, characterization and efficient catalysis for epoxidation of  
allylic alcohols**

Qiaofei Xu, Yingguang Li, Ran Ban, Zhao Li, Xiao Han, Pengtao Ma, Vikram Singh, Jingping Wang\*  
and Jingyang Niu\*

*Henan Key Laboratory of Polyoxometalate Chemistry, Institute of Molecule and Crystal Engineering,  
College of Chemistry and Chemical Engineering, Henan University, Kaifeng, Henan 475004, P. R. China.*

Contains

Figure S1: The infrared spectrum of the three POMs.

Figure S2: The XRD of the three POMs.

Figure S3: The structure of the POMs

Figure S4: The plots for  $\chi_M^{-1}$  vs T between 1.8 K and 300 K for  
three POMs.

Figure S5: The TGA curves of Ni1, Ni2 and Ni3.

Figure S6: The Vis spectra of Ni1, Ni2 and Ni3.

Figure S7: the comparison of solution  $^1\text{H}$  NMR spectra of the three  
POMs and glyphosate.

## IR

The infrared spectrum of the three POMs from 4000 to 500  $\text{cm}^{-1}$  have shown the similar peaks. Here, the peaks of W-O<sub>b</sub>-W, W-O<sub>c</sub>(As) and W=O appear at 876  $\text{cm}^{-1}$ , 705  $\text{cm}^{-1}$  and 928  $\text{cm}^{-1}$ , respectively. Besides, the peaks of glyphosate ligand are mainly divided into two group: 1110  $\text{cm}^{-1}$  (the stretching vibration of P-O), 1595  $\text{cm}^{-1}$  and 1394  $\text{cm}^{-1}$  (the peaks of carboxyl). In addition, the strong band at 3430  $\text{cm}^{-1}$  corresponds to the stretching vibration of O-H and the sharp peak at 1640  $\text{cm}^{-1}$  corresponds to the bend vibration of O-H in crystal water.

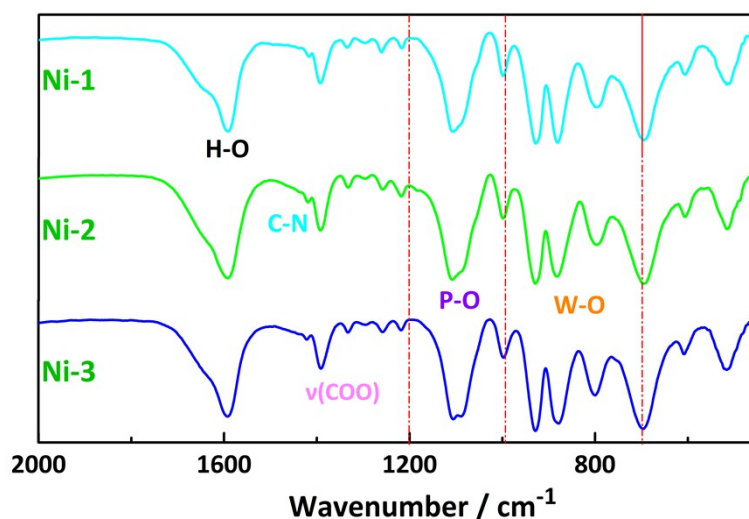

Fig. S1. The infrared spectrum of the three POMs.

## XPRD

In order to detect the purity of test sample, the powder XRD analysis of three POMs has completed. In Fig. S2, the powder XRD pattern of the POMs are well in agreement with their simulated ones from X-ray single-crystal data, and peak intensity is discrepant due to the anisotropic effects of crystal. No apparent differences can be found in the patterns, implying that the sample used for all the characterization and test is pure.

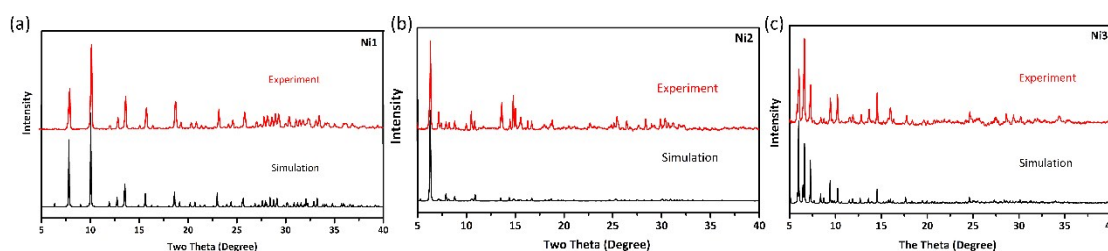

Fig. S2. The XRD of the three POMs

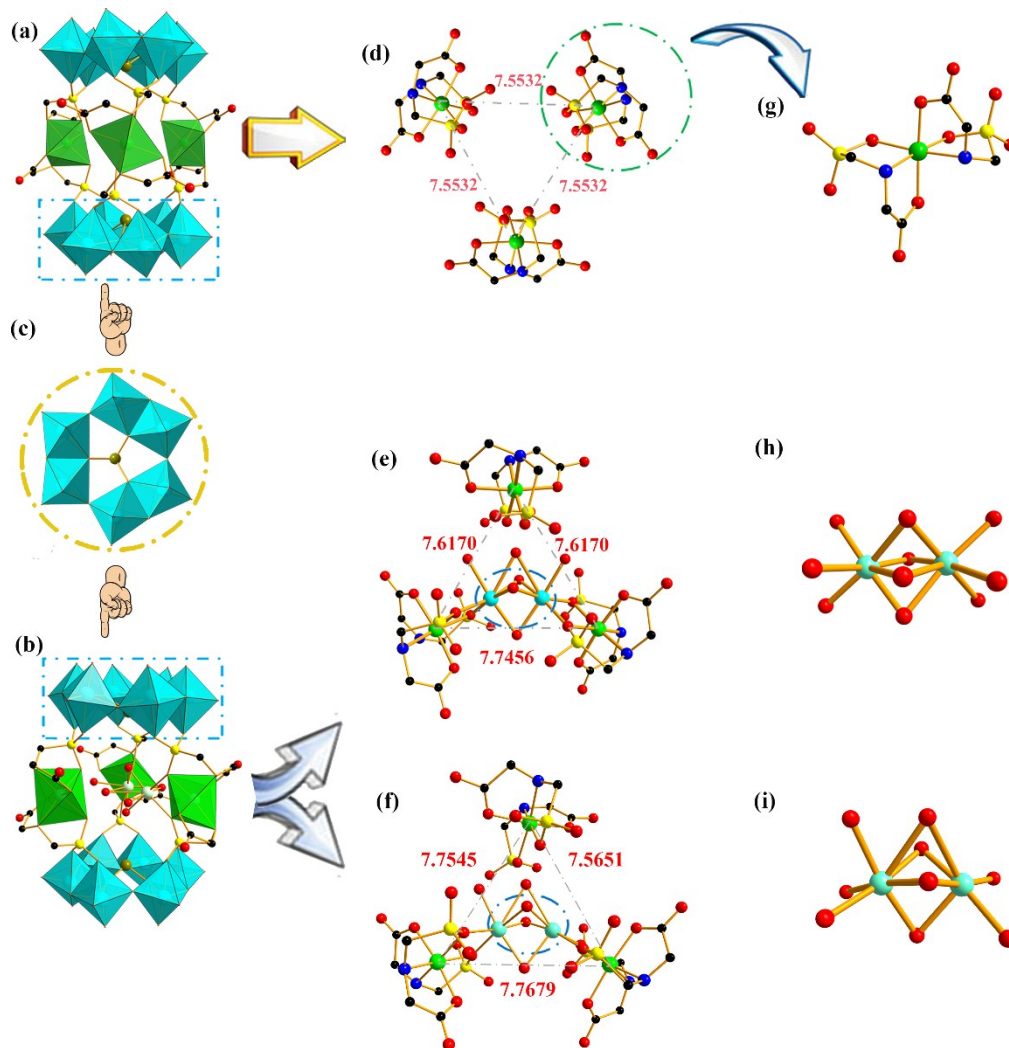

Fig. S3. (a) The polyhedral/ball-and-stick representation of the polyanionic skeleton of Ni1; (b) The ball-and-stick representation of the building blocks; (c) The planform of the three Ni atoms incorporated with glyphosate ligands; (d) the coordination mode between one Ni atom and two ligands.

## Structure

## Magnetic Properties

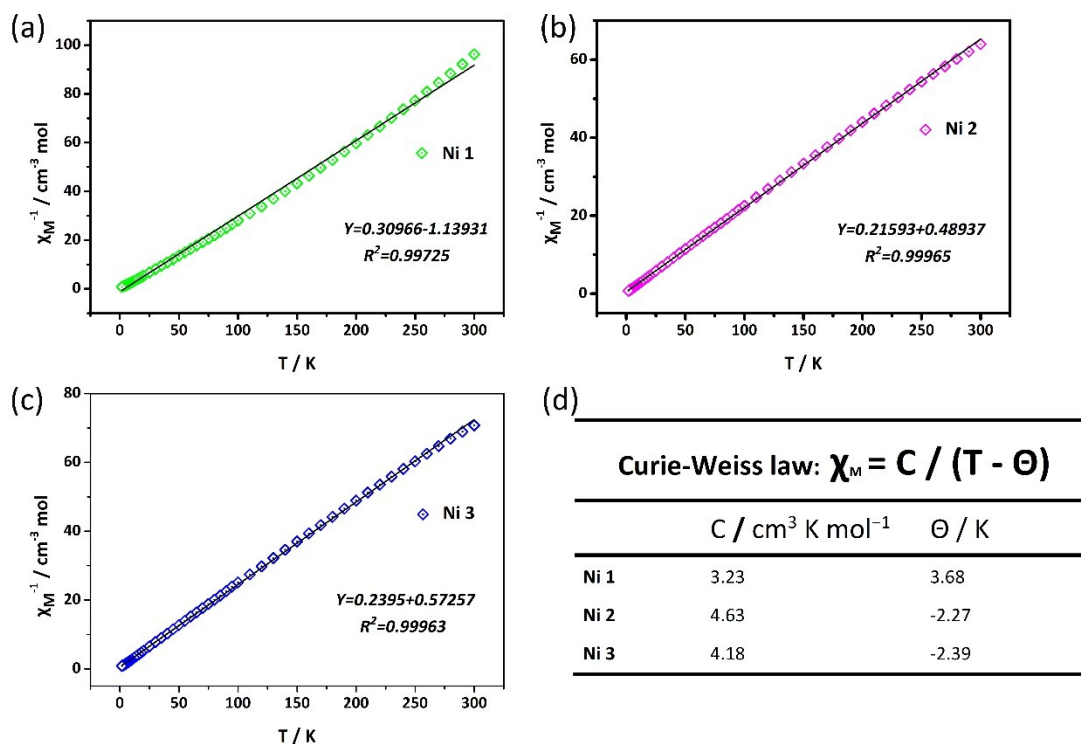

Fig. S4. The plots for and  $\chi_M^{-1}$  vs  $T$  between 1.8 K and 300 K for Ni1 (a), Ni2 (b) and Ni3 (c); (d) The Curie-Weiss law and the Curie-Weiss constants of three POMs.

## TG analysis

Thermal gravimetric analyses of the three POMs have been investigated in the flowing  $\text{N}_2$  atmosphere with heating at a speed of  $10 \text{ }^\circ\text{C min}^{-1}$  in the range of 25–870  $^\circ\text{C}$ . As it has shown in Fig. S5, all of them exhibited two steps weight loss from 25–870. For **Ni1**, the first weight loss of 13.38% (calcd. 14.19%) was from 25 to 338  $^\circ\text{C}$ , which was assigned to the release of 30 crystal water molecules and the sublimation of  $\text{As}_2\text{O}_3$ . The second weight loss of 10.47% (calcd. 9.93%) from 338–832  $^\circ\text{C}$  corresponded to the removal of six  $\{\text{OOCCH}_2\text{NCH}_2\}$  groups. As to **Ni2** and **Ni3**, there were also two weight loss steps in the temperature range of 25–870  $^\circ\text{C}$ , which are similar with **Ni1**: the first weight loss (Found 15.73%, calcd. 15.42% for **Ni2**; Found 14.59%, calcd. 14.60% for **Ni3**) were assigned to the liberation of 32 water molecules for **Ni2** but 30.5 water molecules for **Ni3** and  $\text{As}_2\text{O}_3$  of **Ni2** and **Ni3**, while the temperature range was 25–347  $^\circ\text{C}$  and 25–322  $^\circ\text{C}$ , respectively. Whereafter, the six  $\{\text{OOCCH}_2\text{NCH}_2\}$  groups also left at the range of 347–870  $^\circ\text{C}$  for **Ni2** and 322–870  $^\circ\text{C}$  for **Ni3** corresponding to the weight loss of 10.30% (calcd. 10.28%) for **Ni2** and 10.12% (calad. 10.08%) for **Ni3**.

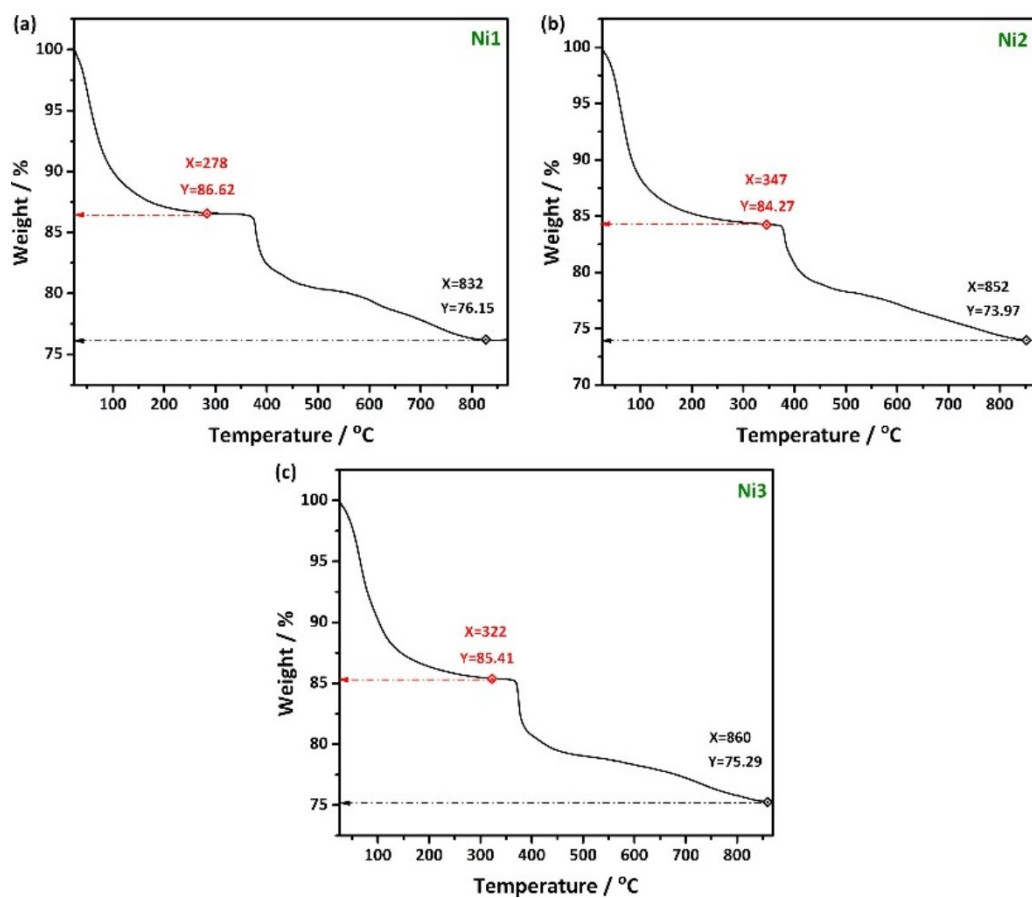

Fig. S5. The TGA curves of Ni1 (a), Ni2 (b) and Ni3 (c)

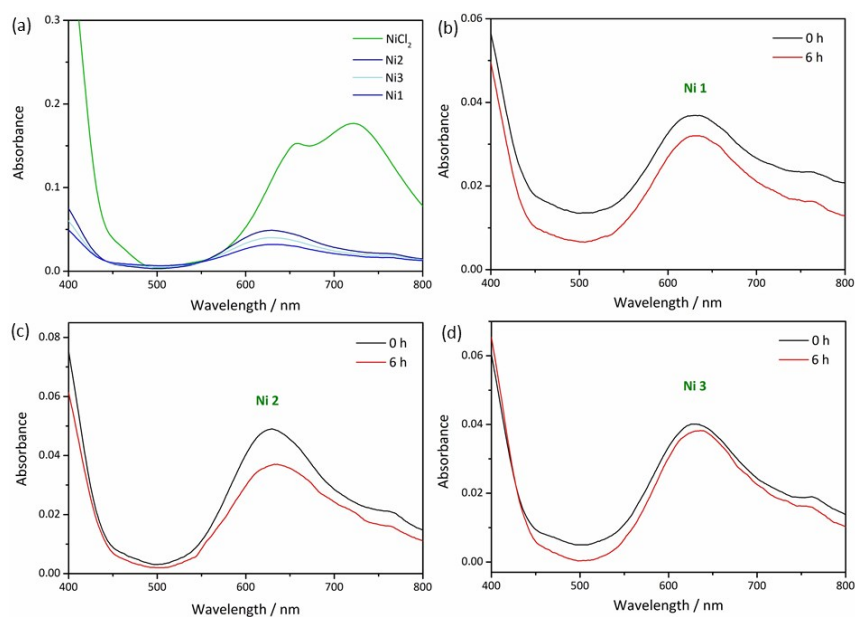

Fig. S6. (a) The Vis spectra of Ni1, Ni2, Ni3 and NiCl<sub>2</sub>; The compared Vis spectra of the POMs aqueous solutions between 0 h and 6 h: (b) Ni1; (c) Ni2; (d) Ni3.

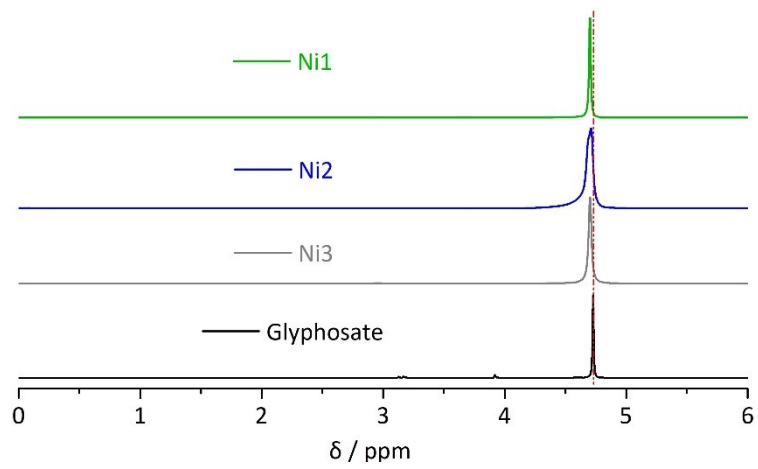

Fig. S7. the comparison of solution <sup>1</sup>H NMR spectra of the three POMs and glyphosate.
